# Supplementary material for: One-dimensional and two-dimensional coordination polymers from cluster modular construction
Source: Royal Society of Chemistry journal article supplement (doi:10.1039/d1ce00206f), 2021-01-01
Supplement: d1ce00206f1.pdf [file d1ce00206f1.pdf]

## Electronic Supplementary Information

### One-dimensional and two-dimensional coordination polymers from cluster modular construction

JieLi,<sup>ab</sup> Yi Tan,<sup>a</sup> Chen Cao,<sup>a</sup> Zhi-Kang Wang,<sup>a</sup> Zheng Niu<sup>\*a</sup> Ying-Lin Song<sup>c</sup> and Jian-Ping  
Lang<sup>\*ab</sup>

<sup>a</sup>*College of Chemistry, Chemical Engineering and Materials Science, Soochow University, Suzhou  
215123, People's Republic of China*

<sup>b</sup>*State Key Laboratory of Organometallic Chemistry, Shanghai Institute of Organic Chemistry,  
Chinese Academy of Sciences, Shanghai 200032, People's Republic of China*

<sup>c</sup>*School of Physical Science and Technology, Soochow University, Suzhou 215006, People's  
Republic of China*

\* Correspondence authors at: *College of Chemistry, Chemical Engineering and Materials Science,  
Soochow University, Suzhou 215123, People's Republic of China.*

Tel: +86-512-65882865; fax: +86-512-65880328.

E-mail address: [jplang@suda.edu.cn](mailto:jplang@suda.edu.cn) (J.P. Lang).

## Contents

### Experiment section

|                                                                                                                                                                                          |     |
|------------------------------------------------------------------------------------------------------------------------------------------------------------------------------------------|-----|
| <b>1. General procedures</b> .....                                                                                                                                                       | S4  |
| <b>2. Third-order NLO measurement of 1-3</b> .....                                                                                                                                       | S4  |
| <b>Fig. S1</b> Experimental (top) and theoretical (bottom) ESI-TOF-MS spectra of $[\text{Tp}^*\text{WS}_3\text{Cu}(\text{L1})_2 + 2\text{CH}_3\text{OH} + \text{H}]^+$ in <b>2</b> ..... | S6  |
| <b>Fig. S2</b> Experimental (top) and theoretical (bottom) ESI-TOF-MS spectra of $[\text{Tp}^*\text{WS}_3\text{Cu}_3(\text{L1})_3]^{2+}$ in <b>3</b> .....                               | S7  |
| <b>Fig. S3</b> Modules for the basic structural components of <b>2</b> and <b>3</b> .....                                                                                                | S8  |
| <b>Fig. S4</b> Normalized Z-scan data of <b>L1</b> ( $5.02 \times 10^{-4}$ M in MeCN at 532 nm) under open-aperture conditions, showing no detectable nonlinear absorption signal.....   | S9  |
| <b>Fig. S5</b> Normalized Z-scan data of <b>L1</b> ( $5.02 \times 10^{-4}$ M in MeCN at 532 nm) under closed-aperture conditions, showing no detectable nonlinear refraction signal..... | S9  |
| <b>Fig. S6</b> Normalized Z-scan data of <b>1</b> ( $5.02 \times 10^{-4}$ M in MeCN at 532 nm) under an open-aperture conditions, showing no detectable nonlinear absorption signal..... | S10 |
| <b>Fig. S7</b> Normalized Z-scan data of <b>1</b> ( $5.02 \times 10^{-4}$ M in MeCN at 532 nm) under closed-aperture conditions, showing no detectable nonlinear refraction signal.....  | S10 |
| <b>Fig. S8</b> Normalized Z-scan data of <b>2</b> ( $5.02 \times 10^{-4}$ M in MeCN at 532 nm) under open-aperture conditions, showing the nonlinear absorption.....                     | S11 |
| <b>Fig. S9</b> Normalized Z-scan data of <b>2</b> ( $5.02 \times 10^{-4}$ M in MeCN at 532 nm) under closed-aperture conditions, showing no detectable nonlinear refraction signal.....  | S11 |
| <b>Table S1</b> The third-order NLO parameters for <b>2</b> and <b>3</b> .....                                                                                                           | S12 |

|                                                                                                                                                                                                   |     |
|---------------------------------------------------------------------------------------------------------------------------------------------------------------------------------------------------|-----|
| <b>Fig. S10</b> The TGA curve of <b>2</b> .....                                                                                                                                                   | S12 |
| <b>Fig. S11</b> The TGA curve of <b>3</b> . .....                                                                                                                                                 | S12 |
| <b>Fig. S12</b> UV-vis spectra of $\text{Cu}(\text{MeCN})_4\text{BF}_4$ and $\text{Cu}(\text{MeCN})_4\text{PF}_6$ ( $2.50 \times 10^{-5}$ M)<br>in MeCN.....                                      | S13 |
| <b>Fig. S13</b> UV-vis spectra of <b>L1</b> , <b>1</b> , <b>2</b> , <b>3</b> $\text{Cu}(\text{MeCN})_4\text{BF}_4$ and $\text{Cu}(\text{MeCN})_4\text{PF}_6$ measured<br>in the solid state. .... | S13 |
| <b>References</b> .....                                                                                                                                                                           | S13 |

## Experiment section

### 1. General procedures

Elemental analyses (C, H and N) were measured on a Carlo-Erba CHNO-S microanalyzer. UV–Vis spectra of solution and solid state were performed by Varian Cary-50 UV–Vis spectrophotometer. Fourier-transform infrared (FT-IR) spectra in the range 4000-400 $\text{cm}^{-1}$  were conducted by Varian 1000 FT-IR spectrometer as KBr disks. ESI-TOF MS spectra were recorded on a Bruker micrOTOF-Q III mass spectrometer. Thermogravimetric analysis (TGA) was conducted by Mettler Toledo Star System at a heating rate of 10  $^{\circ}\text{C}/\text{min}$  under nitrogen atmosphere.

### 2. Third-order NLO measurement and details of 1-3

The solutions of **L1** and **1-3** ( $5.02 \times 10^{-4}$  M) in MeCN were placed in a 2 mm quartz cuvette. They were stable in air and laser irradiation under experimental conditions. The pico-second Z-scan technique and a linear polarized laser light ( $\lambda = 532$  nm; repetition rate = 2 Hz; width = 15 ps) generated from a frequency-doubled, mode-locked, Q-switched Nd: YAG laser were applied to investigate absorption and refraction. The test method was the same as that reported previously.<sup>S1</sup>

The nonlinear absorption data of **1-3** in MeCN were measured using the Z-scan technique with open aperture. The transmittance of light ( $T$ ) is a function of the sample's  $Z$  position. The nonlinear absorption ( $\alpha = \beta(I_i)$ ) and the linear absorption coefficient ( $\alpha_0$ ) are determined by formula (1) below:

$$T(Z) = \frac{\alpha_0}{\sqrt{\pi\beta I_i(Z)(1 - e^{-\alpha_0 L})}} \int_{-\infty}^{\infty} \ln \left[ 1 + \beta I_i(Z) \frac{1 - e^{-\alpha_0 L}}{\alpha_0} e^{-\tau^2} \right] d\tau \quad (1)$$

where  $\alpha$  is the effective third-order NLO absorptive coefficient,  $\tau$  is the time, and  $L$  was the sample thickness.

The nonlinear refractive data was determined by the ratio of the transmittance measured by closed- and open-aperture. The difference between trough and peak positions ( $\Delta Z_{V-P}$ ), and difference between their normalized transmittance values ( $\Delta T_{V-P}$ ) fit the following two formula originated for a third-order NLO process. Also, the effective third-order NLO refractive index  $n_2$  could be achieved by calculation with formula (3):

$$\Delta Z_{V-P} = 1.72\pi\omega_0^2/\lambda \quad (2)$$

$$n_2^{eff} = \lambda\alpha_0\Delta T_{V-P}/\left[0.812\pi I(1 - e^{\alpha L})\right] \quad (3)$$

where  $I$  is the peak irradiation intensity at focus, and  $\lambda$  is the wavelength of the laser.<sup>S2</sup>

The effective third-order NLO susceptibility  $\chi^{(3)}$  and the second hyperpolarizability  $\gamma$  values could be obtained by calculation with the following formulae (4)–(7) from  $\beta$  and  $n_2$ .

$$\chi_I^{(3)} = 9 \times 10^8 \varepsilon_0 n_0^2 c^2 \beta / (4\omega\pi) \quad (4)$$

$$\chi_R^{(3)} = cn_0^2 n_2 / (80\pi) \quad (5)$$

$$\chi^{(3)} = [(\chi_I^{(3)})^2 + (\chi_R^{(3)})^2]^{1/2} \quad (6)$$

$$\gamma = \chi^{(3)} / [N((n_0^2 + 2)/3)^4] \quad (7)$$

Where  $N$  is the density of the molecules in the unit of number of molecules per cubic centimeters, and  $n_0$  is the linear refractive index of MeCN ( $n_0 = 1.34$ ),  $c$  is the speed of light, and  $\omega$  is the optical frequency.

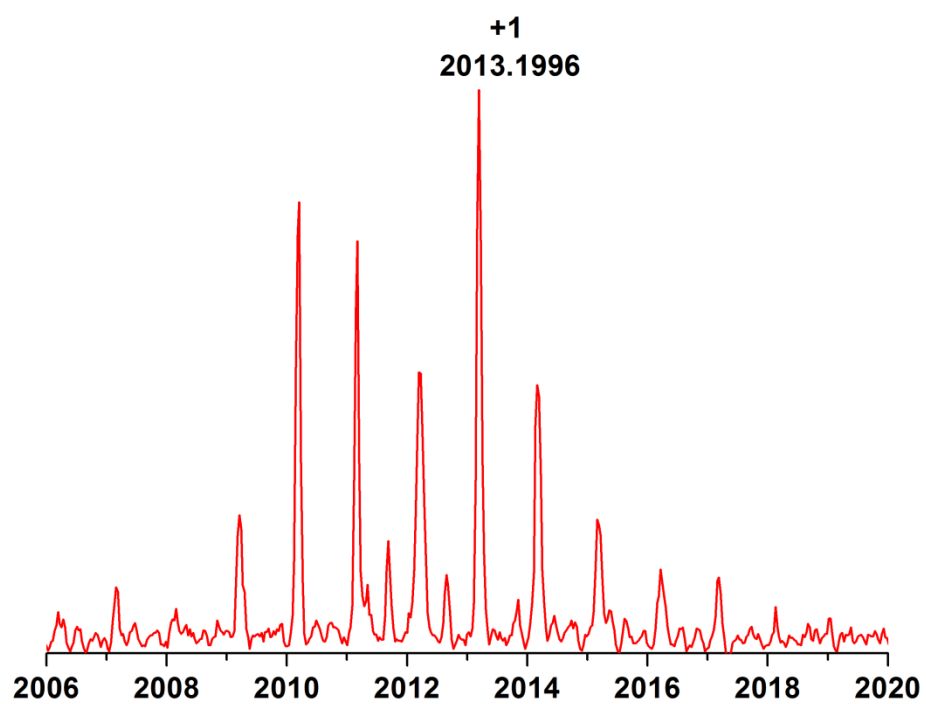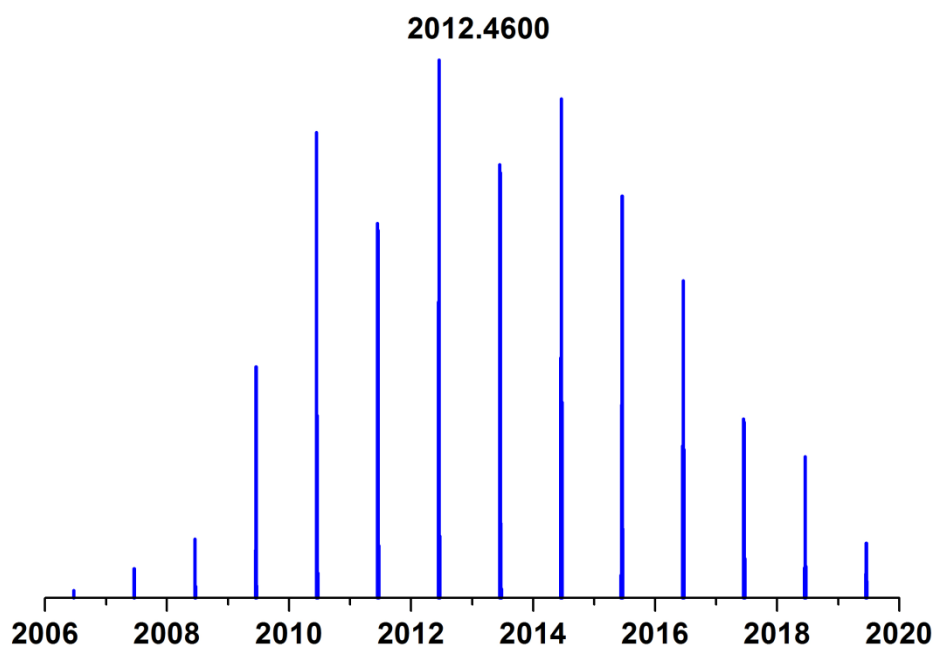

**Fig. S1** Experimental (top) and theoretical (bottom) ESI-TOF-MS spectra of  $[\text{Tp}^*\text{WS}_3\text{Cu}(\text{L1})_2 + 2\text{CH}_3\text{OH} + \text{H}]^+$  in **2**.

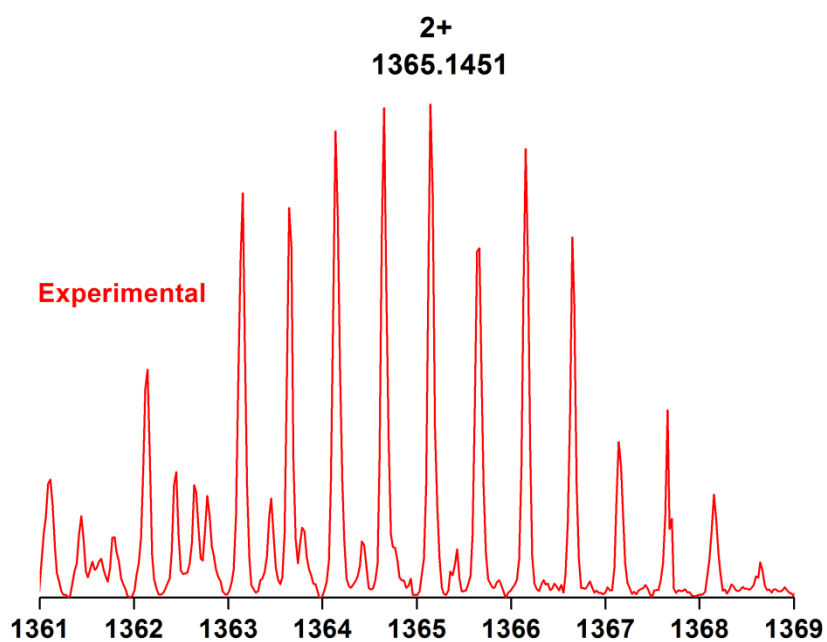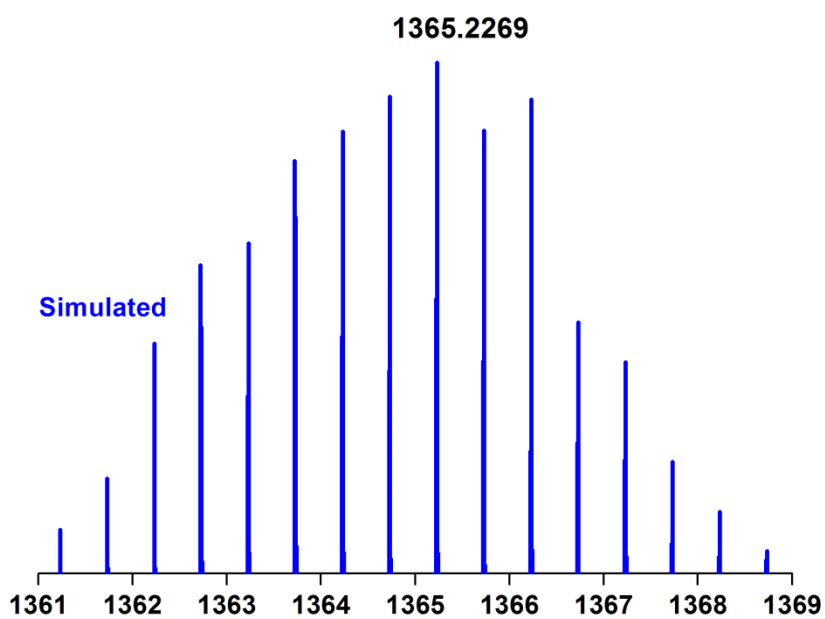

**Fig. S2** Experimental (top) and theoretical (bottom) ESI-TOF-MS spectra of  $[\text{Tp}^*\text{WS}_3\text{Cu}_3(\text{L1})_3]^{2+}$  in **3**.

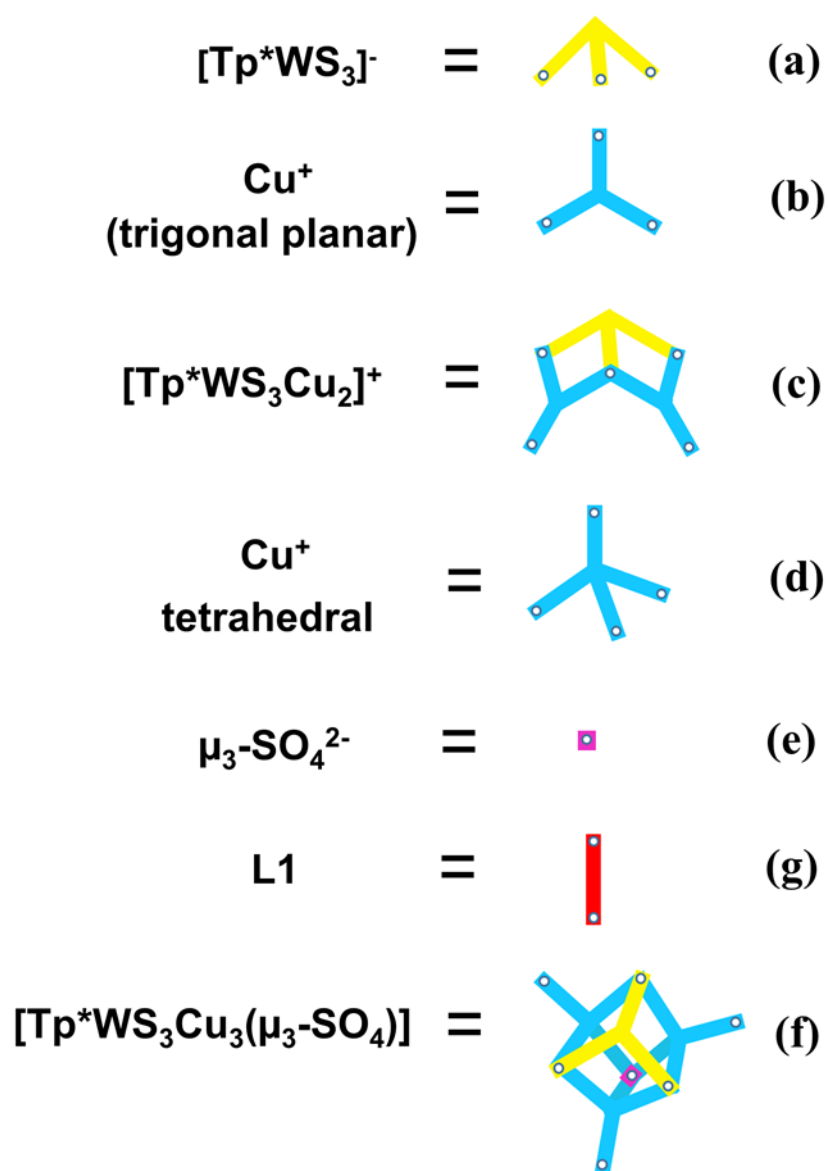

**Fig. S3** Modules for the basic structural components of **2** and **3**.



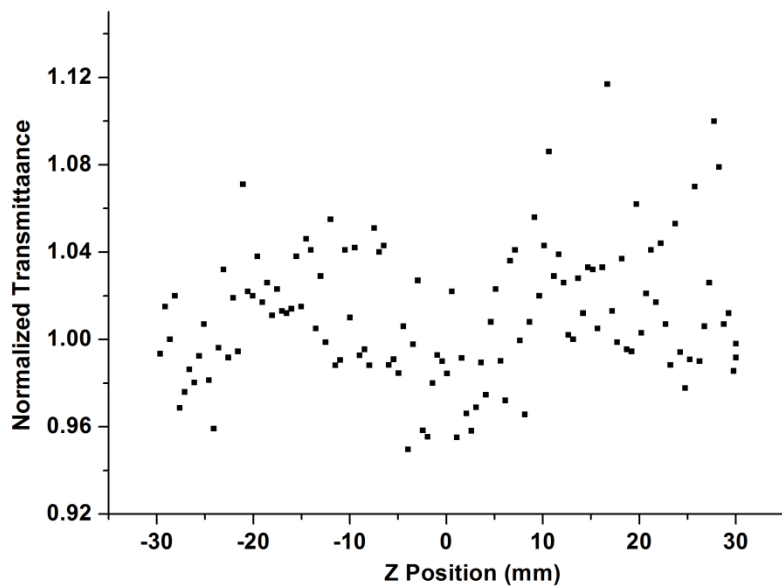

**Fig. S4** Normalized Z-scan data of **L1** ( $5.02 \times 10^{-4}$  M in MeCN at 532 nm) under open-aperture conditions, showing no detectable nonlinear absorption signal.

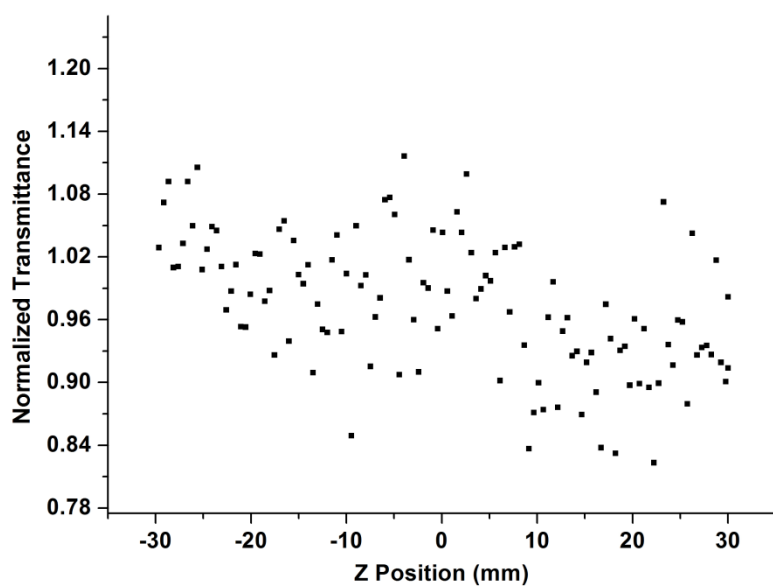

**Fig. S5** Normalized Z-scan data of **L1** ( $5.02 \times 10^{-4}$  M in MeCN at 532 nm) under closed-aperture conditions, showing no detectable nonlinear refraction signal.

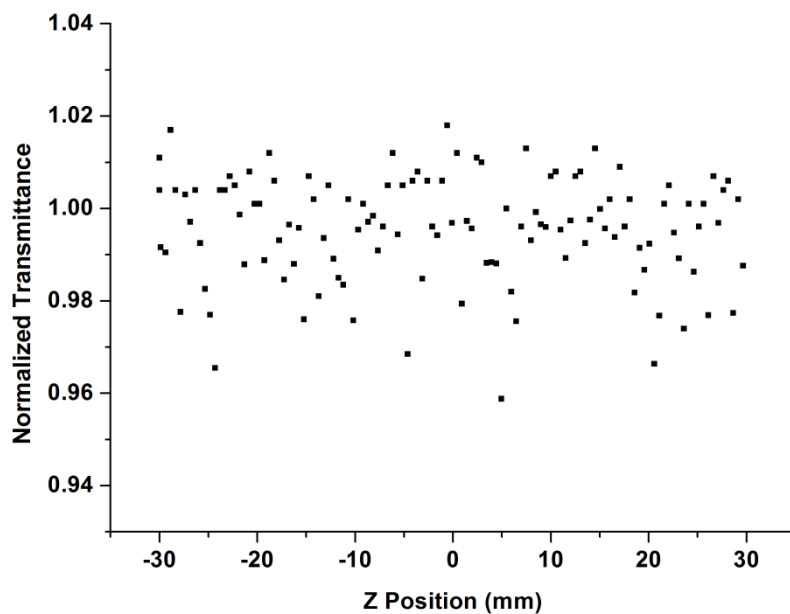

**Fig. S6** Normalized Z-scan data of **1** ( $5.02 \times 10^{-4}$  M in MeCN at 532 nm) under open-aperture conditions, showing no detectable nonlinear absorption signal.

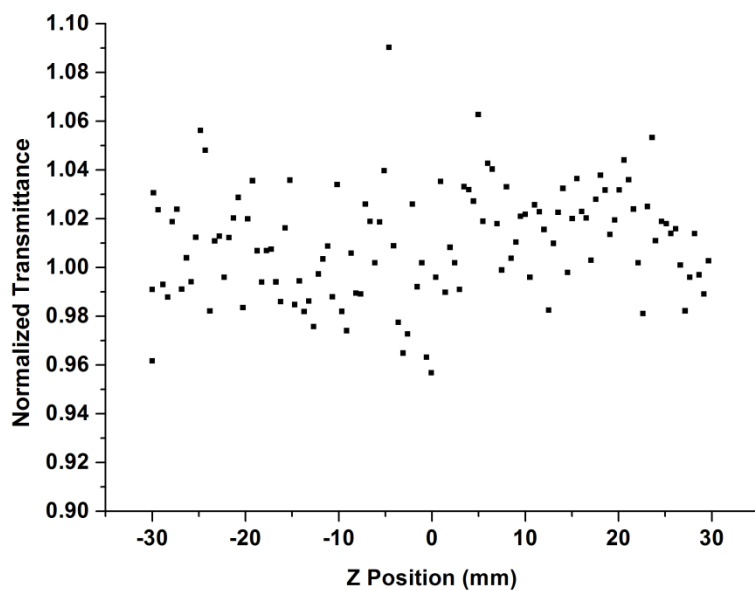

**Fig. S7** Normalized Z-scan data of **1** ( $5.02 \times 10^{-4}$  M in MeCN at 532 nm) under closed-aperture conditions, showing no detectable nonlinear refraction signal.

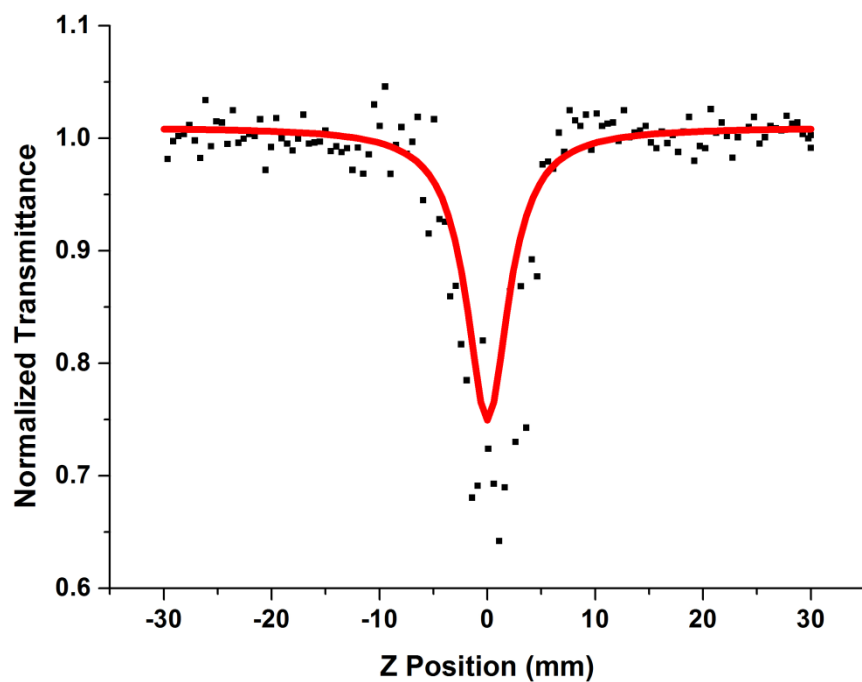

**Fig. S8** Normalized Z-scan data of **2** ( $5.02 \times 10^{-4}$  M in MeCN at 532 nm) under open-aperture conditions, showing the nonlinear absorption.

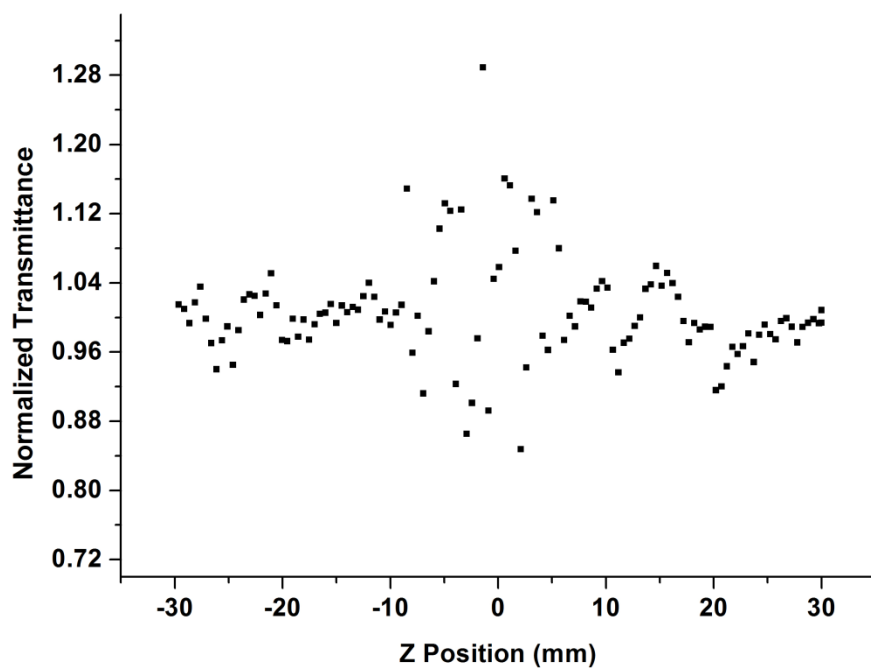

**Fig. S9** Normalized Z-scan data of **2** ( $5.02 \times 10^{-4}$  M in MeCN at 532 nm) under closed-aperture conditions, showing no detectable nonlinear refraction signal.

**Table S1** The third-order NLO parameters for **2** and **3**.

| Compound | $T_0$ | $n_2$<br>( $10^{-17}$ esu) | $\chi_R^{(3)}$<br>( $10^{-11}$ esu) | $\chi_I^{(3)}$<br>( $10^{-11}$ esu) | $\chi^{(3)}$<br>( $10^{-11}$ esu) | $\gamma$<br>( $10^{-29}$ esu) |
|----------|-------|----------------------------|-------------------------------------|-------------------------------------|-----------------------------------|-------------------------------|
| <b>2</b> | 65%   | /                          | /                                   | 0.27                                | 0.27                              | 0.36                          |
| <b>3</b> | 49%   | -2.0                       | -4.29                               | 0.23                                | 4.30                              | 5.57                          |

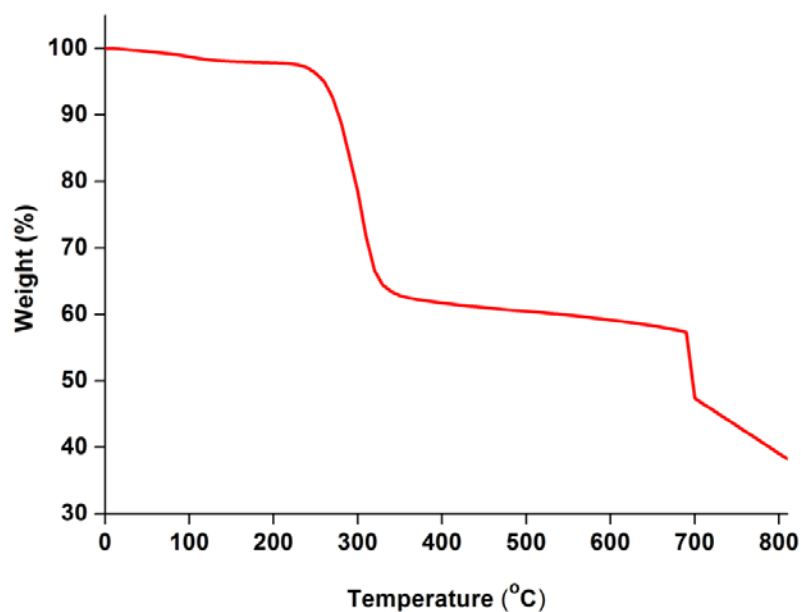

**Fig. S10** The TGA curve of **2**.

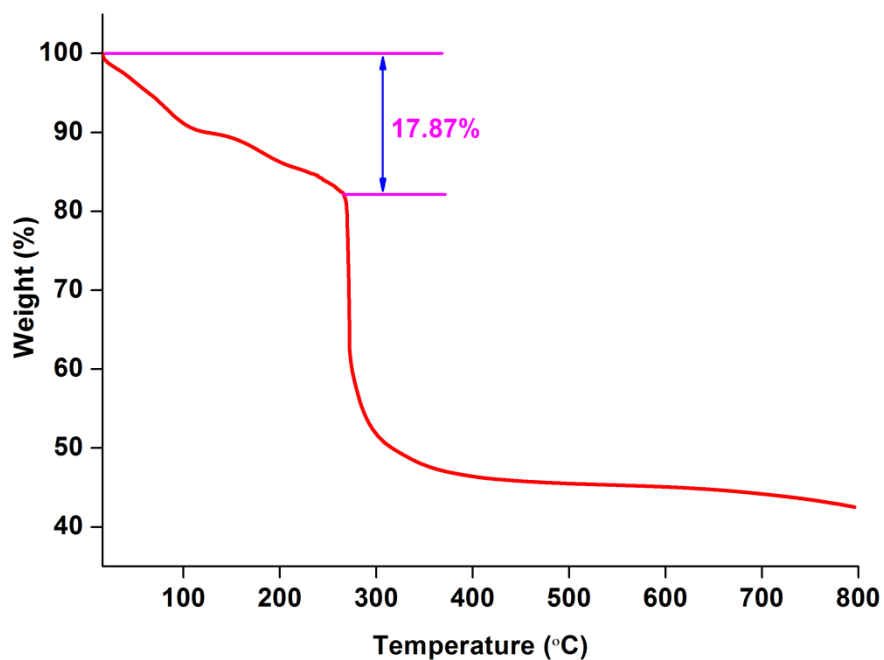

**Fig. S11** The TGA curve of **3**.

According to the TGA data, about ten Et<sub>2</sub>O molecules were calculated by weight loss before 265 °C for **3** (obsd: 17.87%, calcd: 18.00%).

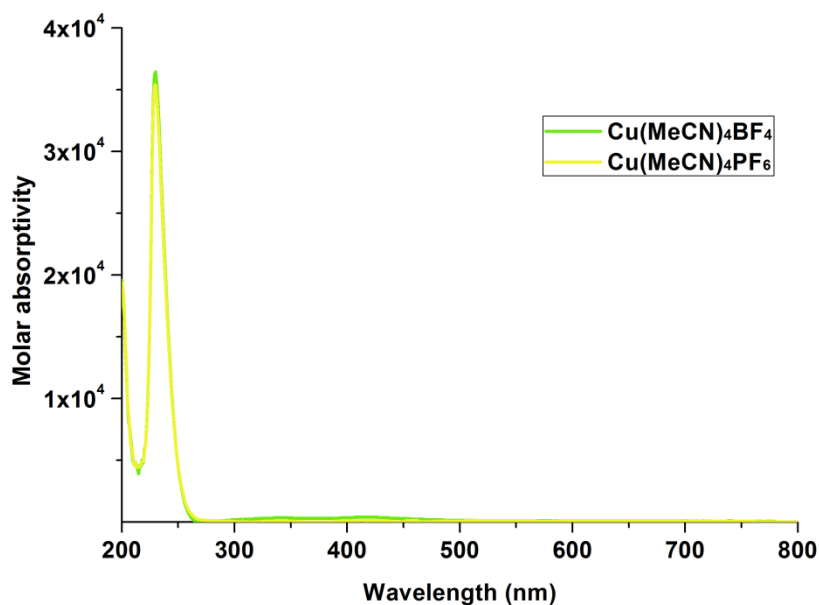

**Fig. S12** UV-vis spectra of  $\text{Cu}(\text{MeCN})_4\text{BF}_4$  and  $\text{Cu}(\text{MeCN})_4\text{PF}_6$  ( $2.50 \times 10^{-5}$  M) in MeCN.

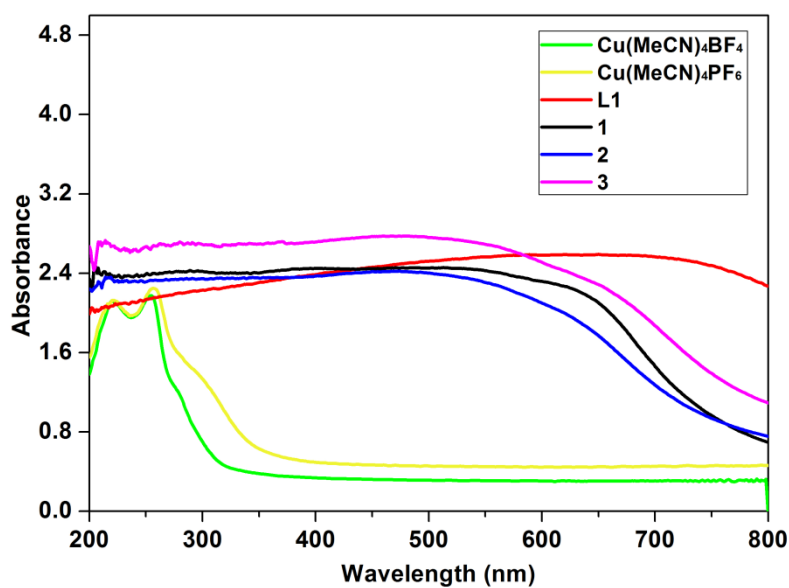

**Fig. S13** UV-vis spectra of **L1**, **1**, **2**, **3**,  $\text{Cu}(\text{MeCN})_4\text{BF}_4$  and  $\text{Cu}(\text{MeCN})_4\text{PF}_6$  measured in the solid state.

## References

- S1. Z. G. Ren, H. X Li, L. L. Li, Y. Zhang, J. P. Lang, J. Y. Yang and Y. L. Song, *J. Organomet. Chem.*, 2007, **692**, 2205–2215.
- S2. M. Sheik-Bahae, A. A.Said, T. H. Wei, D. J.Hagan and E. W. Van Stryland, *Quantum Electron.*, 1990, **26**, 760–769.
